# Supplementary material
Source: PubMed Central journal article supplement (PMC3208976)
Supplement: supp_77.22.8062_AEM6331-11_supplemental.pdf [file supp_77.22.8062_AEM6331-11_supplemental.pdf]

## Supplementary Material for

### **Diversity and abundance of single-stranded DNA viruses in human faeces**

Min-Soo Kim, Eun-Jin Park, Seong Woon Roh and Jin-Woo Bae\*

\*To whom correspondence should be addressed. E-mail: [baejw@khu.ac.kr](mailto:baejw@khu.ac.kr)

#### **This PDF file includes:**

Figs. S1 to S3

Tables S1 to S4

**Table S1.** Features of participants and samples.

| Individual   | Sample ID | Birth Country | Age | Sex    | Sample amount |
|--------------|-----------|---------------|-----|--------|---------------|
| Individual 1 | F-A       |               | 28  | Male   | 12.4g         |
| Individual 2 | F-B       |               | 29  | Male   | 15.2g         |
| Individual 3 | F-C       | South Korea   | 28  | Male   | 14.4g         |
| Individual 4 | F-D       |               | 23  | Female | 14.1g         |
| Individual 5 | F-E       |               | 27  | Female | 12.4g         |

**Table S2.** The BLAST profile of five viromes comparing with three public databases, the SEED nr, CAMERA nr and CAMERA viral protein databases.

|                  | No. of sequences (%)     |                    |                    |                    |                    |                          |                    |                   |                    |                    |                          |                    |                    |                    |                    |
|------------------|--------------------------|--------------------|--------------------|--------------------|--------------------|--------------------------|--------------------|-------------------|--------------------|--------------------|--------------------------|--------------------|--------------------|--------------------|--------------------|
|                  | SEED_nr                  |                    |                    |                    |                    | CAMERA_v                 |                    |                   |                    |                    | CAMERA_nr                |                    |                    |                    |                    |
|                  | BLASTx ( $E < 10^{-5}$ ) |                    |                    |                    |                    | BLASTx ( $E < 10^{-5}$ ) |                    |                   |                    |                    | BLASTx ( $E < 10^{-5}$ ) |                    |                    |                    |                    |
|                  | F-A                      | F-B                | F-C                | F-D                | F-E                | F-A                      | F-B                | F-C               | F-D                | F-E                | F-A                      | F-B                | F-C                | F-D                | F-E                |
| Raw reads        | 113,054                  | 109,569            | 68,391             | 115,121            | 98,511             | 113,054                  | 109,569            | 68,391            | 115,121            | 98,511             | 113,054                  | 109,569            | 68,391             | 115,121            | 98,511             |
| Quality-filtered | 100,358                  | 98,601             | 61,641             | 107,131            | 86,483             | 100,358                  | 98,601             | 61,641            | 107,131            | 86,483             | 100,358                  | 98,601             | 61,641             | 107,131            | 86,483             |
| Non-redundant    | 90,273<br>(100%)         | 88,810<br>(100%)   | 53,342<br>(100%)   | 95,902<br>(100%)   | 71,806<br>(100%)   | 90,273<br>(100%)         | 88,810<br>(100%)   | 53,342<br>(100%)  | 95,902<br>(100%)   | 71,806<br>(100%)   | 90,273<br>(100%)         | 88,810<br>(100%)   | 53,342<br>(100%)   | 95,902<br>(100%)   | 71,806<br>(100%)   |
| Unknown          | 80,523<br>(89.2%)        | 78,989<br>(88.94%) | 47,246<br>(88.57%) | 86,777<br>(90.49%) | 62,534<br>(87.09%) | 81,738<br>(90.55%)       | 83,190<br>(93.67%) | 49,350<br>(92.5%) | 81,694<br>(85.18%) | 63,447<br>(88.36%) | 78,234<br>(86.66%)       | 71,838<br>(80.89%) | 43,535<br>(81.61%) | 69,779<br>(72.76%) | 54,422<br>(75.79%) |
| Known            | 9,750<br>(10.8%)         | 9,821<br>(11.06%)  | 6,096<br>(11.43%)  | 9,125<br>(9.51%)   | 9,272<br>(12.91%)  | 8,535<br>(9.45%)         | 5,620<br>(6.33%)   | 3,992<br>(7.5%)   | 14,208<br>(14.82%) | 8,359<br>(11.64%)  | 12,039<br>(13.34%)       | 16,972<br>(19.11%) | 9,807<br>(18.39%)  | 26,123<br>(27.24%) | 17,384<br>(24.21%) |
| Virus            | 6,091<br>(6.75%)         | 2,125<br>(2.39%)   | 1,902<br>(3.57%)   | 2,976<br>(3.1%)    | 7,000<br>(9.75%)   | 8,467<br>(9.38%)         | 5,620<br>(6.33%)   | 3,952<br>(7.4%)   | 14,155<br>(14.76%) | 8,348<br>(11.63%)  | 6,186<br>(6.85%)         | 2,381<br>(2.68%)   | 1,274<br>(2.39%)   | 10,255<br>(10.69%) | 4,049<br>(5.64%)   |
| Bacteria         | 3,599<br>(3.99%)         | 6,709<br>(7.55%)   | 4,103<br>(7.69%)   | 6,073<br>(6.33%)   | 2,180<br>(3.04%)   | 8<br>(0.01%)             | 0                  | 35<br>(0.07%)     | 28<br>(0.03%)      | 0                  | 5,661<br>(6.27%)         | 13,944<br>(15.7%)  | 8,263<br>(15.49%)  | 15,758<br>(16.43%) | 13,198<br>(18.38%) |
| Archaea          | 13<br>(0.01%)            | 711 (0.8%)         | 13<br>(0.02%)      | 10<br>(0.01%)      | 19<br>(0.03%)      | 0                        | 0                  | 0                 | 0                  | 0                  | 0                        | 316<br>(0.36%)     | 0                  | 0                  | 0                  |
| Eukarya          | 47<br>(0.05%)            | 276<br>(0.31%)     | 78<br>(0.15%)      | 64<br>(0.07%)      | 73<br>(0.1%)       | 60<br>(0.07%)            | 0                  | 5<br>(0.01%)      | 25<br>(0.03%)      | 11<br>(0.02%)      | 157<br>(0.14%)           | 133<br>(0.15%)     | 153<br>(0.29%)     | 86<br>(0.09%)      | 106<br>(0.15%)     |
| Other            | 0                        | 0                  | 0                  | 2<br>(0.002%)      | 0                  | 0                        | 0                  | 0                 | 0                  | 0                  | 35<br>(0.04%)            | 198<br>(0.22%)     | 117<br>(0.22%)     | 24<br>(0.03%)      | 31<br>(0.04%)      |

**Table S3.** The profiles of viral families of five viromes comparing with three public databases, the SEED nr, CAMERA nr and CAMERA viral protein databases.

|                 |                           | SEED_nr<br>BLASTx ( $E < 10^{-5}$ ) |       |       |       |       | CAMERA_v<br>BLASTx ( $E < 10^{-5}$ ) |       |       |        |       | CAMERA_nr<br>BLASTx ( $E < 10^{-3}$ ) |       |       |        |       |
|-----------------|---------------------------|-------------------------------------|-------|-------|-------|-------|--------------------------------------|-------|-------|--------|-------|---------------------------------------|-------|-------|--------|-------|
|                 |                           | F-A                                 | F-B   | F-C   | F-D   | F-E   | F-A                                  | F-B   | F-C   | F-D    | F-E   | F-A                                   | F-B   | F-C   | F-D    | F-E   |
| Viral sequences |                           | 6,090                               | 2,125 | 1,902 | 2,976 | 7,000 | 8,467                                | 5,620 | 3,952 | 14,155 | 8,348 | 6,186                                 | 2,381 | 1,274 | 10,255 | 4,049 |
| dsDNA           | Myo-                      | 51                                  | 240   | 162   | 210   | 76    | 362                                  | 877   | 328   | 132    | 134   | 19                                    | 165   | 50    | 22     | 47    |
|                 | Podo-                     | 4,252                               | 1,144 | 323   | 778   | 801   | 4,928                                | 1,834 | 507   | 695    | 1,455 | 4,772                                 | 1,948 | 370   | 735    | 1,265 |
|                 | Sipho-                    | 121                                 | 224   | 289   | 278   | 47    | 702                                  | 1,291 | 1,043 | 10,381 | 203   | 42                                    | 41    | 413   | 8,809  | 15    |
|                 | Unclassified Caudovirales | 3                                   | 20    | 12    | 2     | 74    | 138                                  | 252   | 169   | 264    | 131   | 0                                     | 0     | 15    | 92     | 60    |
|                 | Asfar-                    | 1                                   | 0     | 1     | 1     | 0     | 6                                    | 0     | 5     | 0      | 0     | 7                                     | 0     | 6     | 0      | 0     |
|                 | Irido-                    | 0                                   | 11    | 1     | 0     | 0     | 27                                   | 44    | 0     | 0      | 0     | 13                                    | 6     | 0     | 2      | 0     |
|                 | Herpes-                   | 0                                   | 0     | 0     | 0     | 0     | 0                                    | 0     | 7     | 0      | 0     | 0                                     | 0     | 0     | 0      | 0     |
|                 | Adeno-                    | 0                                   | 0     | 0     | 0     | 0     | 2                                    | 0     | 0     | 0      | 0     | 0                                     | 0     | 0     | 0      | 0     |
|                 | Mimi-                     | 4                                   | 29    | 5     | 5     | 2     | 14                                   | 28    | 29    | 20     | 0     | 3                                     | 3     | 6     | 7      | 0     |
|                 | Phycodna-                 | 11                                  | 22    | 2     | 0     | 3     | 23                                   | 24    | 6     | 0      | 6     | 0                                     | 5     | 0     | 0      | 0     |
|                 | Pox-                      | 5                                   | 55    | 13    | 0     | 0     | 8                                    | 19    | 20    | 0      | 0     | 0                                     | 0     | 0     | 0      | 0     |
|                 | Tecti-                    | 0                                   | 0     | 2     | 13    | 0     | 16                                   | 0     | 0     | 10     | 9     | 9                                     | 0     | 0     | 4      | 0     |
|                 | Bicauda-                  | 0                                   | 0     | 0     | 0     | 0     | 0                                    | 7     | 0     | 0      | 0     | 0                                     | 0     | 0     | 0      | 0     |
|                 | Unclassified viruses      | 0                                   | 2     | 0     | 0     | 0     | 102                                  | 89    | 90    | 5      | 26    | 2                                     | 4     | 4     | 2      | 0     |
| ssDNA           | Ino-                      | 0                                   | 0     | 0     | 0     | 0     | 0                                    | 12    | 0     | 0      | 0     | 0                                     | 0     | 0     | 0      | 0     |
|                 | Anello-                   | 0                                   | 0     | 0     | 0     | 0     | 0                                    | 0     | 0     | 0      | 0     | 0                                     | 0     | 0     | 0      | 2     |
|                 | Germini-                  | 0                                   | 0     | 0     | 4     | 0     | 0                                    | 0     | 0     | 0      | 0     | 0                                     | 0     | 0     | 0      | 0     |
|                 | Micro-                    | 1,638                               | 377   | 1,087 | 1,655 | 5,993 | 1,800                                | 420   | 1,182 | 2,467  | 6,211 | 1,312                                 | 207   | 408   | 576    | 2,660 |
|                 | Unclassified-             | 0                                   | 0     | 0     | 0     | 0     | 0                                    | 0     | 0     | 0      | 0     | 0                                     | 0     | 0     | 4      | 0     |
| Unclassified    | Unclassified phages       | 0                                   | 1     | 3     | 26    | 1     | 339                                  | 723   | 566   | 181    | 173   | 5                                     | 2     | 2     | 0      | 0     |
| RNA             | Picorna-                  | 4                                   | 0     | 2     | 4     | 3     | 0                                    | 0     | 0     | 0      | 0     | 2                                     | 0     | 0     | 2      | 0     |

**Table S4.** Comparison of viral and bacterial community structures and diversity.

|                            | <b>Sample</b> | <b>Richness<sup>a</sup></b> | <b>Shannon-Wiener index (nats)</b> |
|----------------------------|---------------|-----------------------------|------------------------------------|
| <b>Viral assemblage</b>    | F-A           | 34                          | 3.04                               |
|                            | F-B           | 24                          | 2.79                               |
|                            | F-C           | 26                          | 2.84                               |
|                            | F-D           | 18                          | 2.58                               |
|                            | F-E           | 401                         | 4.19                               |
| <b>Bacterial community</b> | F-A           | 1636 / 2510                 | 4.64                               |
|                            | F-B           | 1214 / 1632                 | 4.25                               |
|                            | F-C           | 1607 / 2197                 | 4.55                               |
|                            | F-D           | 914 / 1247                  | 4.67                               |
|                            | F-E           | 1492 / 1953                 | 4.59                               |

<sup>a</sup> In bacterial richness, Chao1 and Ace estimators are shown in order.

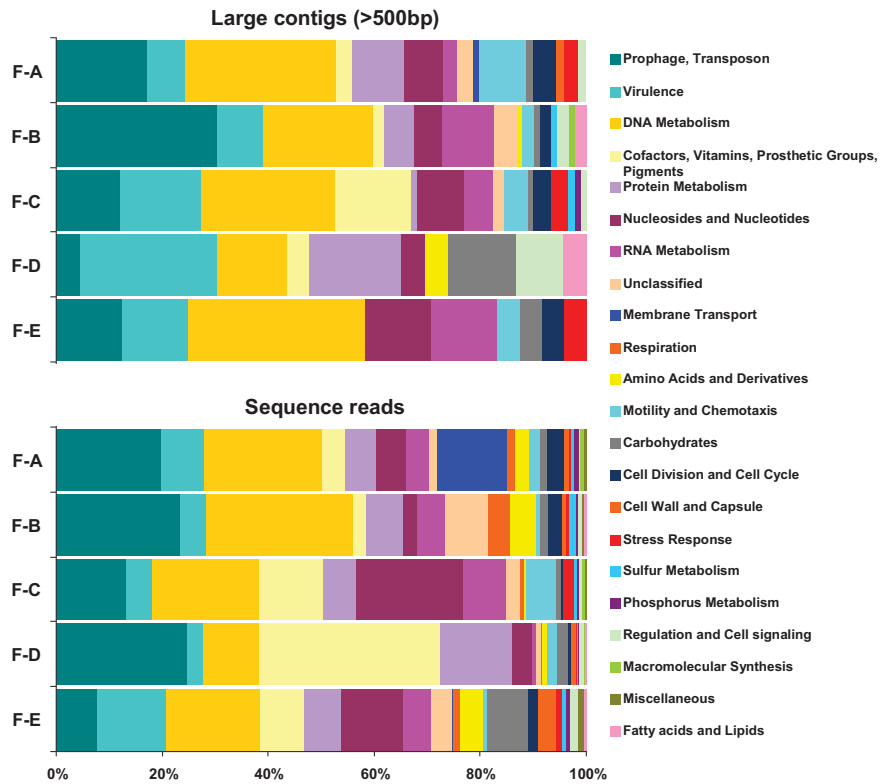

**Fig. S1.** Functional gene profiles of five viromes comparing to the SEED database. Both the sequence reads and large contigs (>500 bp) of five viromes were compared in BLAST searches (BLASTx,  $E$ -value  $< 10^{-2}$ ). The functional categories including higher than 1% of the identified sequences were shown.











**Fig. S2.** Multiple sequence alignment of the capsid protein sequences of the microphages from human faeces, cultured isolates and environmental samples. MUSCLE program (<http://www.ebi.ac.uk/Tools/muscle>) was used for sequence alignment and aligned partial capsid protein sequences of human faeces, Sagarso Sea, Highborne Cay, Antarctic lake, *Bacteroides* and *Prevotella* and cultured isolations (Chlamydia-, Bdellovibrio- and Spiroplasma-, Enterobacteria phages) were visualized using Jalview (<http://www.jalview.org/>).

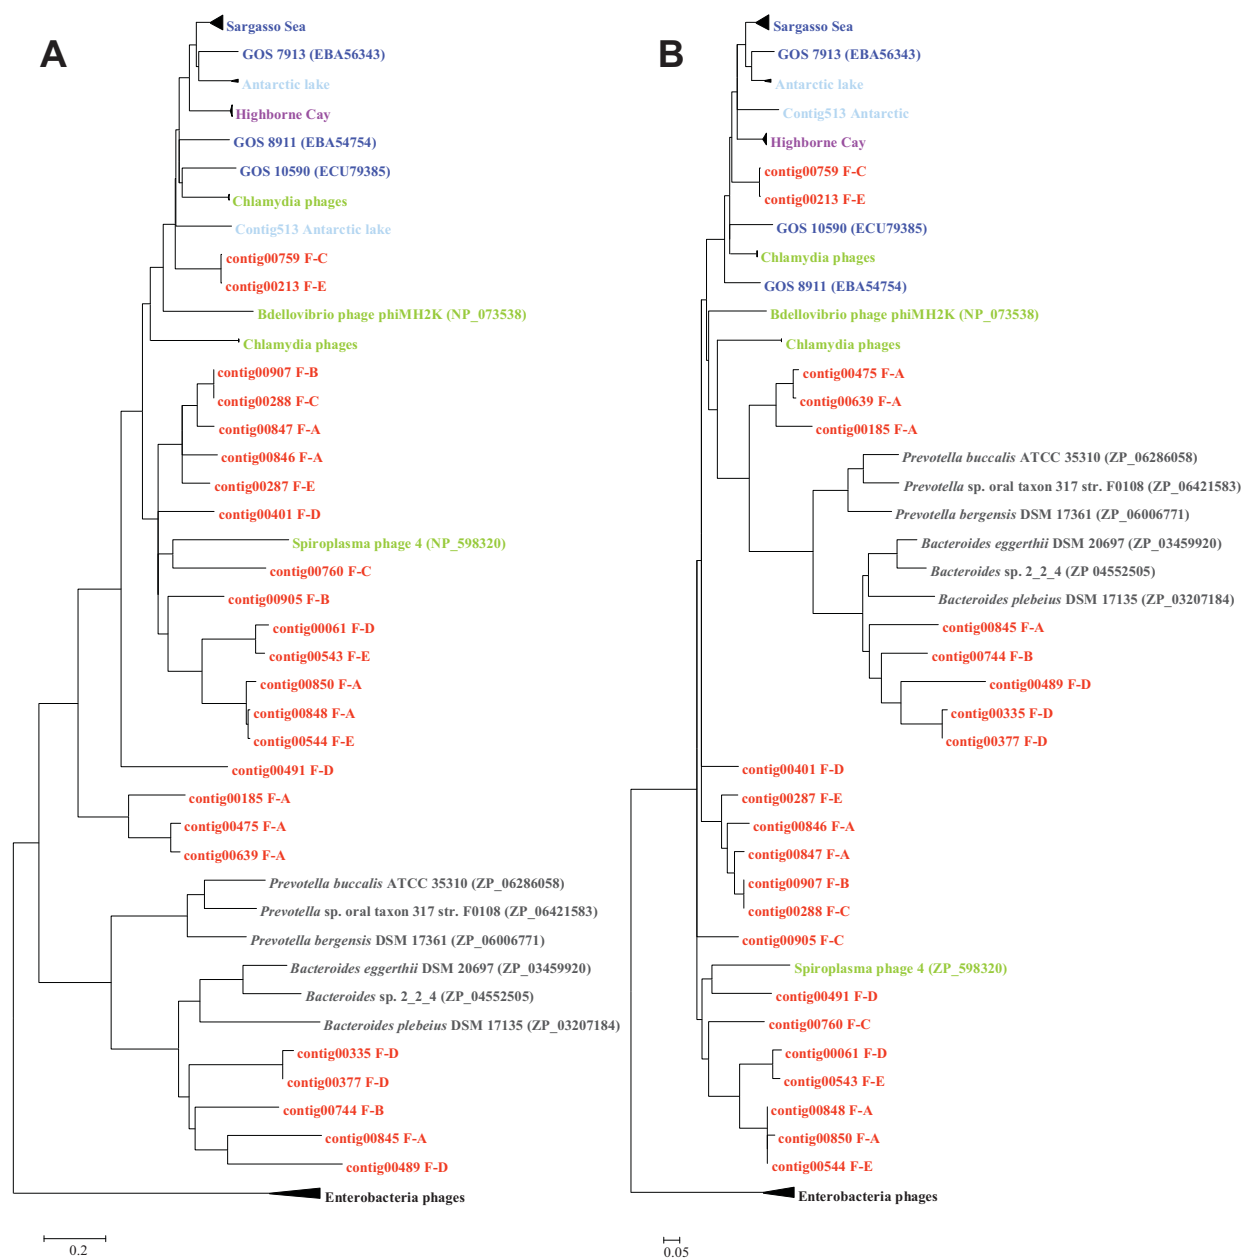

**Fig. S3.** Phylogenetic trees of the capsid genes of the microphages from human faeces, environmental samples, *Bacteroides* and *Prevotella* and cultured isolations at the protein (A) and nucleic (B) levels. The sequences were shown in colour as follows: human faeces (red), Sagarssso Sea (deep blue), Highborne Cay (purple), Antarctic lake (light blue), *Bacteroides* and *Prevotella* (gray) and cultured isolations (Chlamydia-, Bdellovibrio- and Spiroplasma phages, green; Enterobacteria phages, black). The phylogenetic trees were constructed based on neighbor-joining algorithm using MEGA 4. Enterobacteria phages were used as outgroups. The scale bars represents 0.2 amino-acid and 0.05 nucleotide substitutions per site, respectively.
